# Supplementary material for: Comparative expression profiling in grape (Vitis vinifera) berries derived from frequency analysis of ESTs and MPSS signatures
Source: PubMed Central journal article supplement (PMC2423195; doi:10.1186/1471-2229-8-53), 2008-05-12
Supplement: 1471-2229-8-53-S3.pdf [file 1471-2229-8-53-S3.pdf]

**Additional File 3:** Example of a grape EST contig matched by multiple MPSS signatures.

**Contig ID:** CTG1027770

**Annotation:** putative transcription factor BTF3-like mRNA

| # | Signature          | Abundance | Strand | Position |
|---|--------------------|-----------|--------|----------|
| 1 | GATCTCCTCAAACAAAG  | 6         | +      | 316      |
| 2 | GATCTTGTTGCTGGGCA  | 1367      | +      | 480      |
| 3 | GATCCACTAACAAACCCA | 8         | -      | 319      |

MPSS signatures identified within the sense-strand sequence of CTG1027770. Uppercase text indicates the predicted ORF; lowercase indicates the predicted UTRs. Sense signatures are highlighted in blue. The position of the most abundant signature (#2) is consistent with the most-3' *DpnII* site, which is the position predicted to be measured by MPSS. Other signatures may result from signatures resulting from other transcripts, alternative polyadenylation or incomplete digestion during the construction of the cDNA library.

```
gggggaagctctctcaatcactgctatccacccaaaccctagctctaaccctacccaagATGAATAGGGAGAAGCTTA
TGAAGATGGCTGGTGCAGTTCGCACCGGTGAAAGGGTAGCATGAGAAGAAAGAAGAAGGCTGTTTACAAAACAACCA
CAACTGATGACAAAAGGCTTCAAAGCACCCATAAGAGAATAGGAGTCAATGCCATACCTGCTATTGAGGAGGTCAACA
TCTTTAAAGATGATGTGGTTATTCAGTTTTTTAAACCCCAAAGTTCAAGCCTCTATAGCCGCAAACACTTGGGTTGTTA
GTGGATCTCCTCAAACAAAGAAATTGCAGGACATTCTTCCCTGGAATTATCAACCAGTTGGGACCAGATAACTTGGACA
ACCTGAGGAAGCTGGCTGAGCAGTTCCAGAAGCAGGCACCTGGTGCAGCAGCAGCCCAAGACGATGATGATG
ATGAGGTCCCCGATCTTGTGCTGGGCAGACCTTTGAAGCTGCAGCAGAAGAGGGTCACACTGCTtgagagagttttt
agaggggttttgtgccattacttataatttccaattgagagttttatcctttatcttctgtttaaccaagtgtttcatttta
tgctctccttgtgacaccatactagacagttgtatgctcctgctgaagactttactatcttccaaatgcctgatttg
gtgttgtctagttaccttaaaagcattttctcagaccatccaattccttttactttcatggttttgcctttatcagag
gaattcattttctccct
```
